# Supplementary material for: Oral drug delivery using a polymeric nanocarrier: chitosan nanoparticles in the delivery of rifampicin
Source: Royal Society of Chemistry journal article supplement (doi:10.1039/d2ma00295g), 2022-01-01
Supplement: d2ma00295g1.pdf [file d2ma00295g1.pdf]

### Supplementary Information

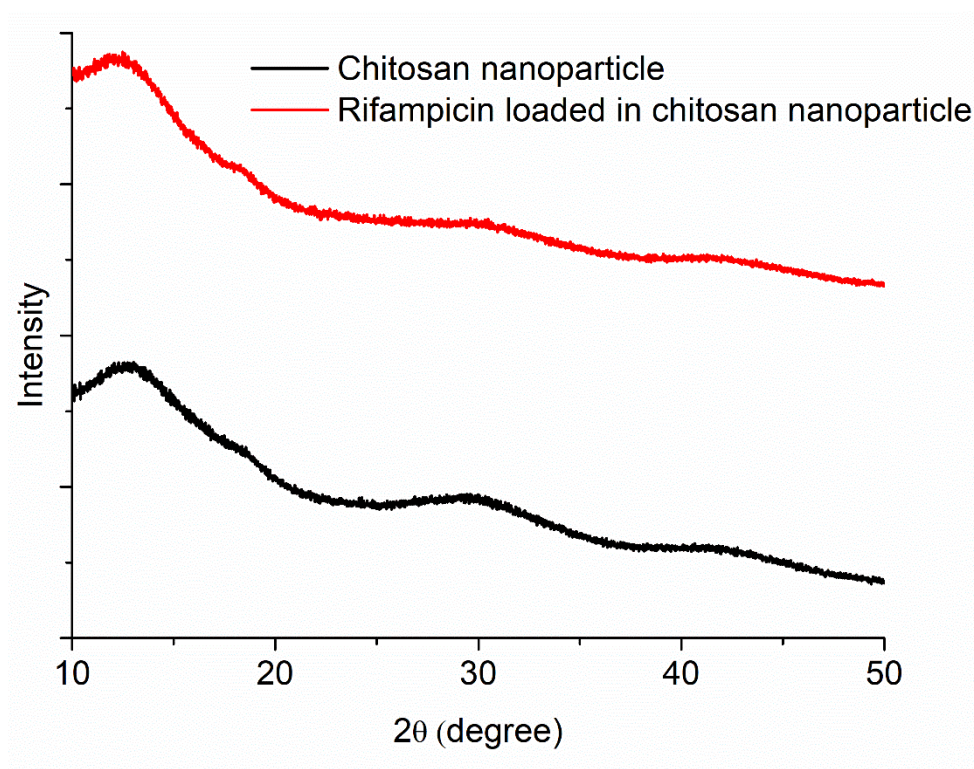

Figure S1: XRD patterns of chitosan nanoparticle and rifampicin loaded nanoparticle

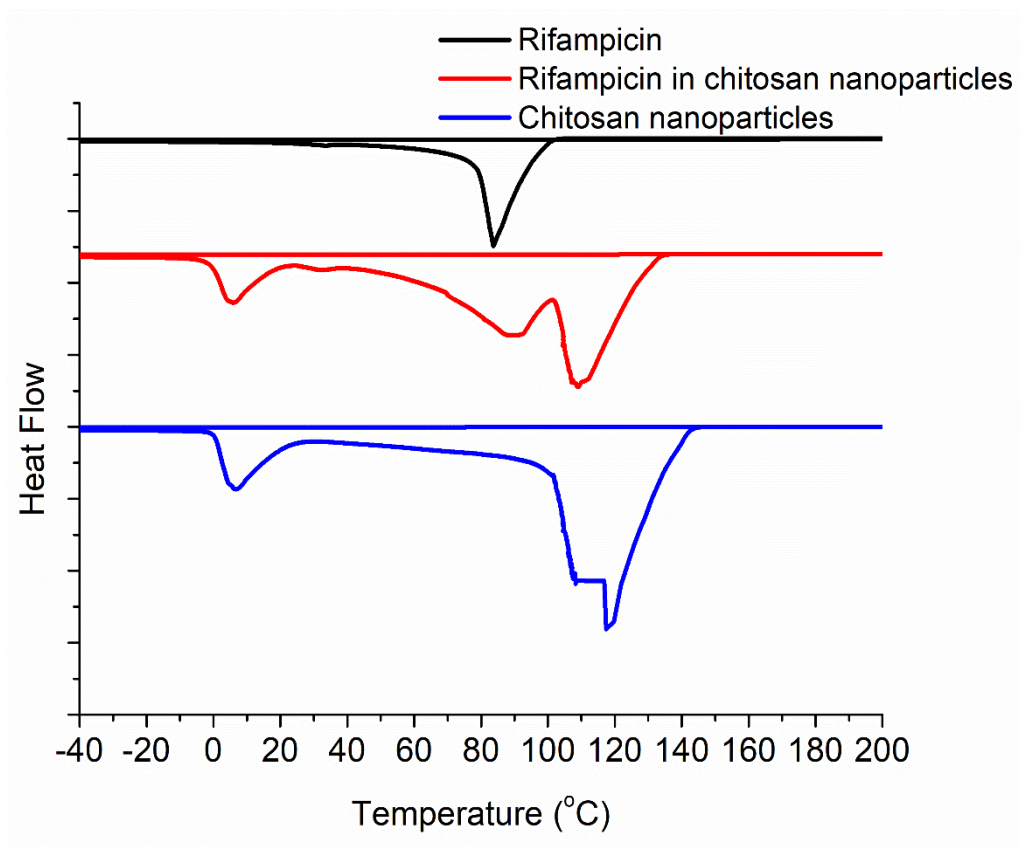

Figure S2: DSC thermograms of rifampicin, chitosan nanoparticles and rifampicin loaded chitosan nano particles.

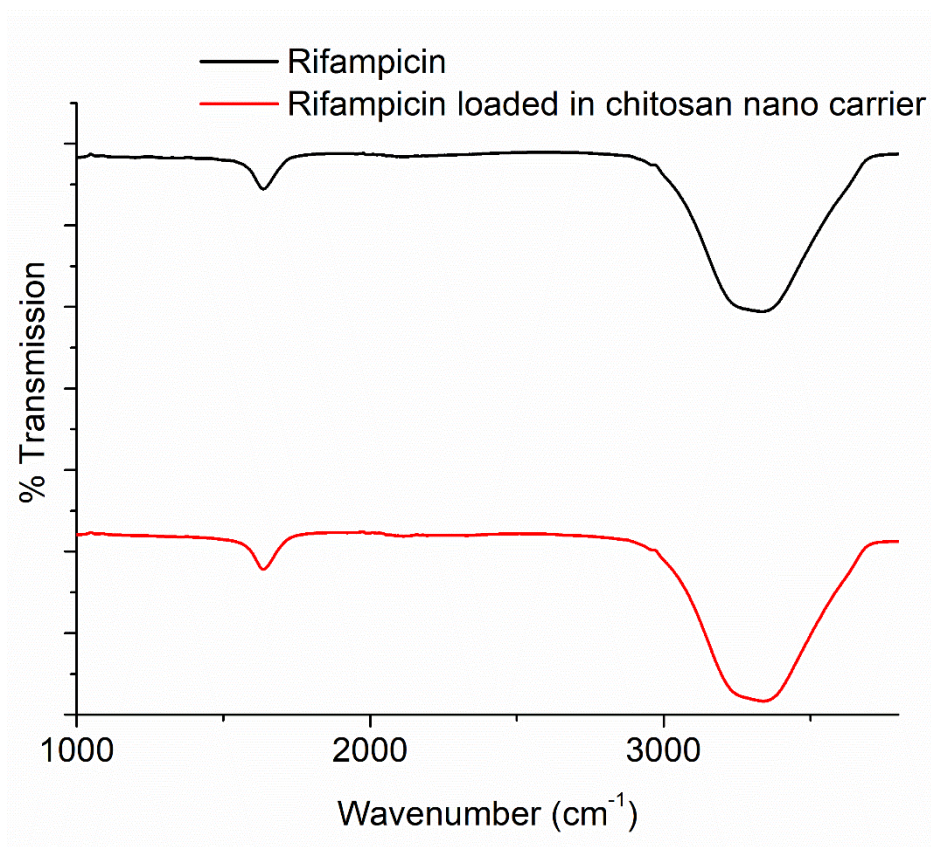

Figure S3: FT IR spectra of rifampicin and rifampicin loaded chitosan nano carriers showing no interaction with the excipients.
